# Supplementary material
Source: PubMed Central journal article supplement (PMC8771005)

# Supplementary Figure 1

## cAMP pathway activation

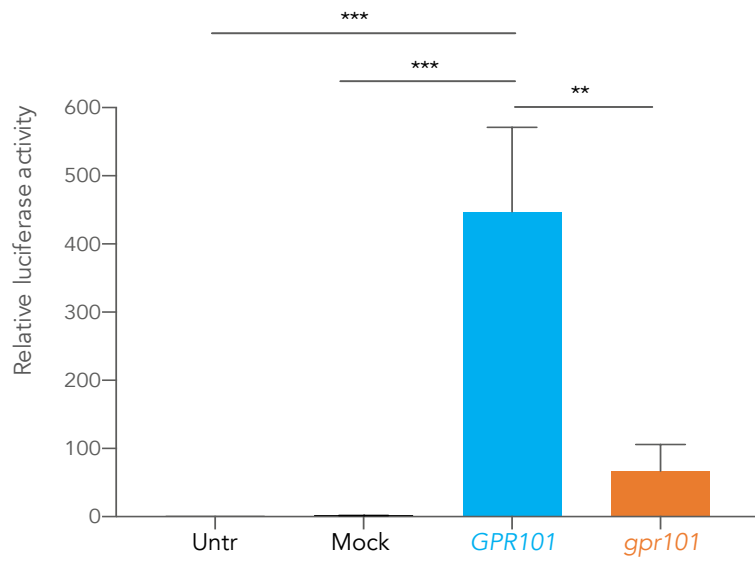

# Supplementary Figure 2

a

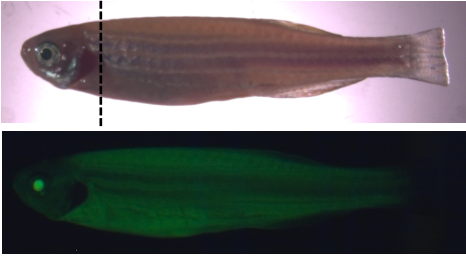

b

heads

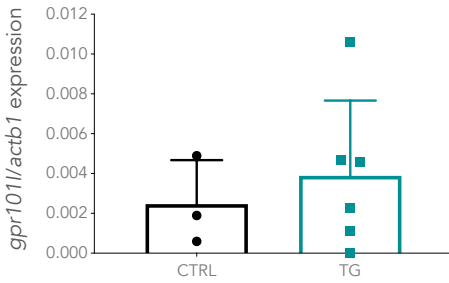

body

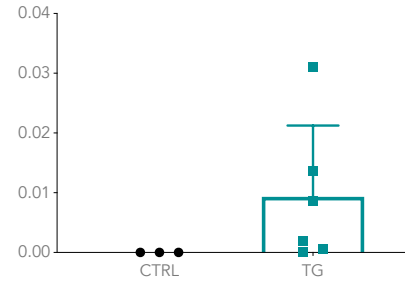

c

heads

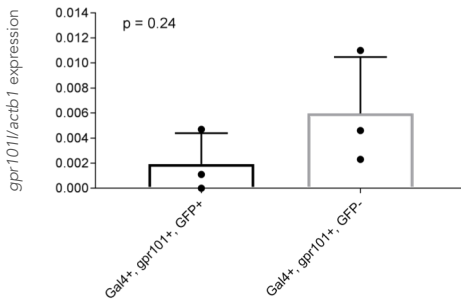

body

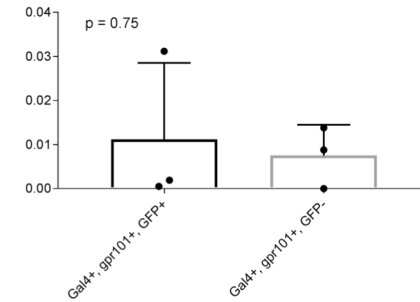

d

Standard length

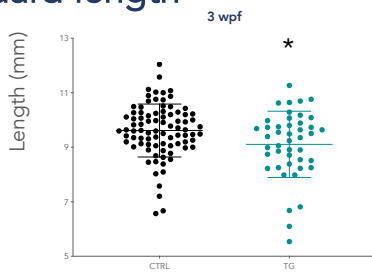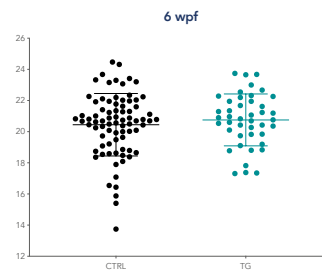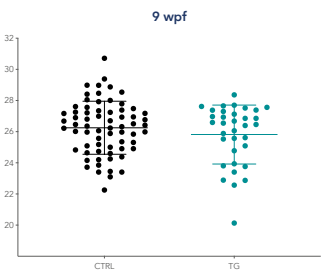

Body weight

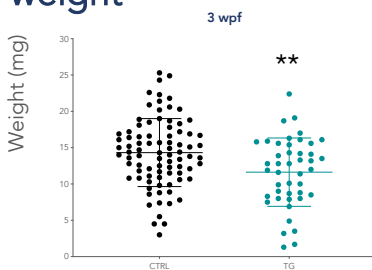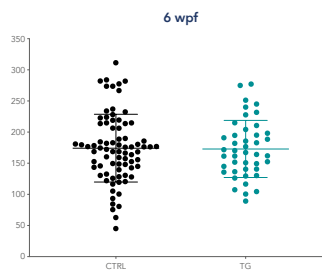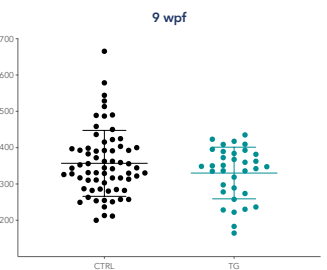

# Supplementary Figure 3

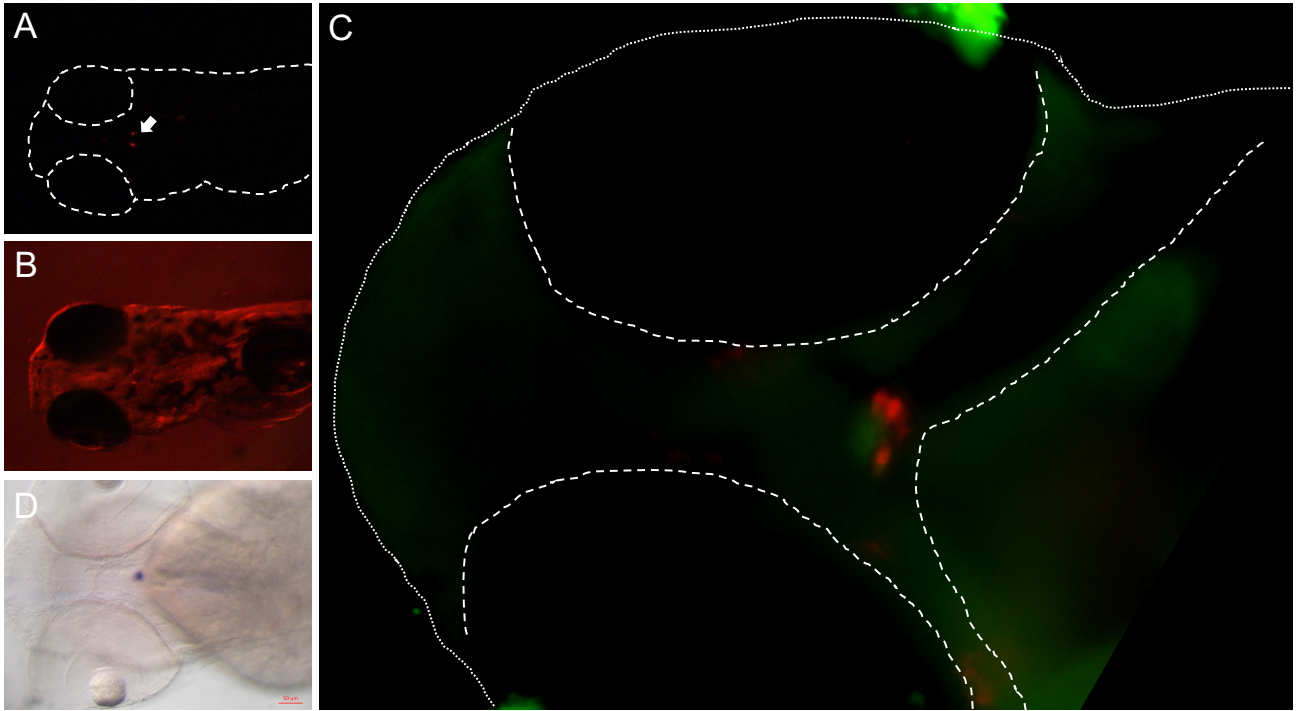

# Supplementary Figure 4

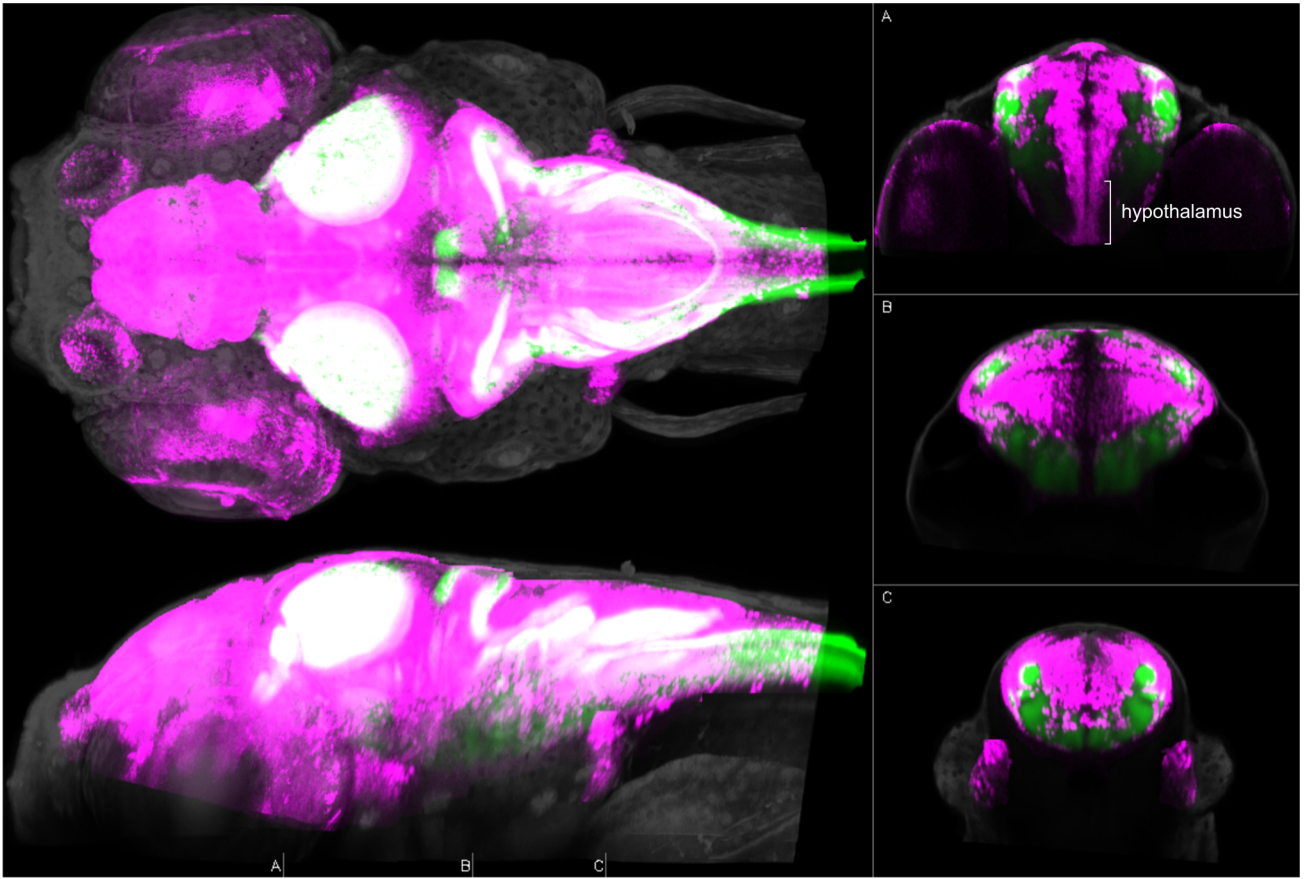



# Supplementary Figure 5

Xa207:Gal4; UAS:gpr101

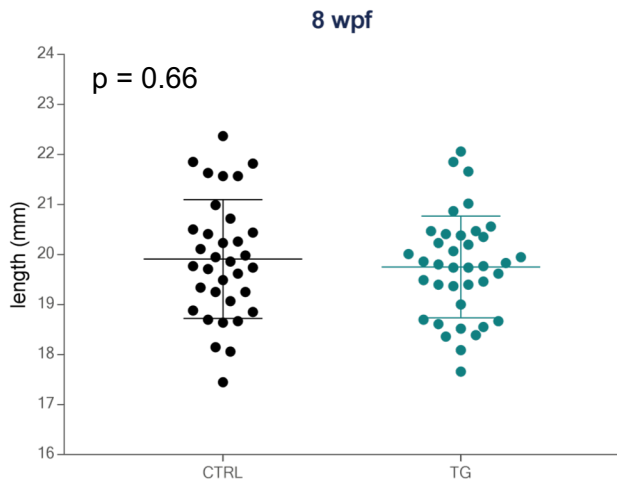

HuC:Gal4; UAS:gpr101

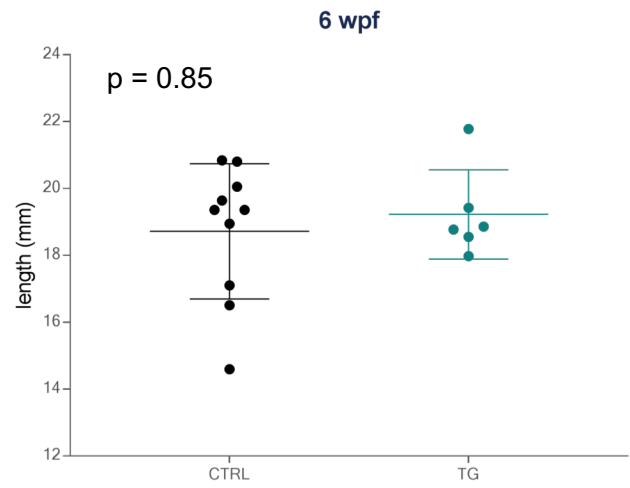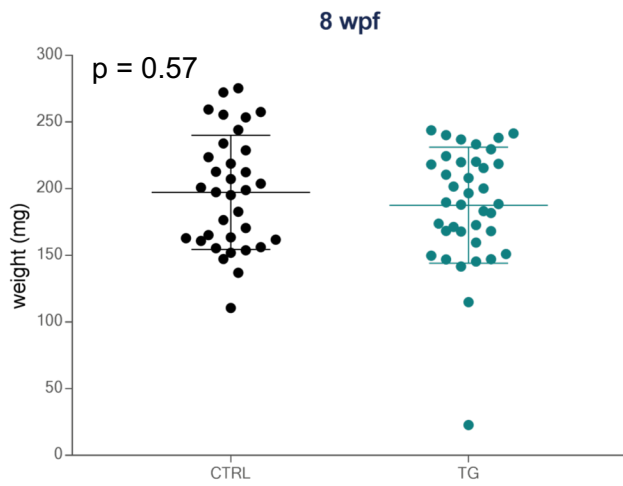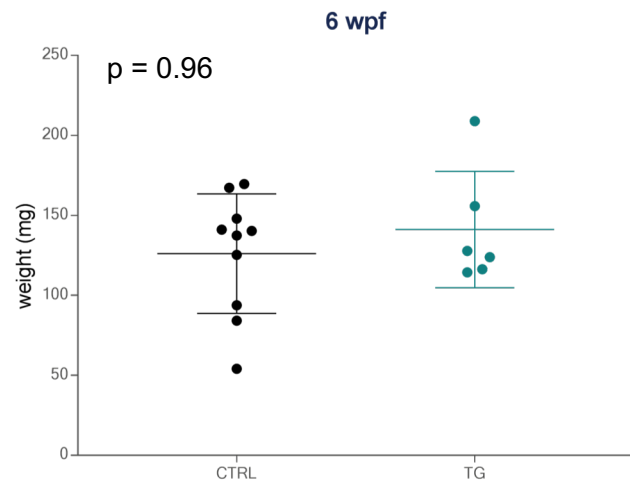

# Supplementary Figure 6

## Gene expression after *gpr101* upregulation – 90% epiboly

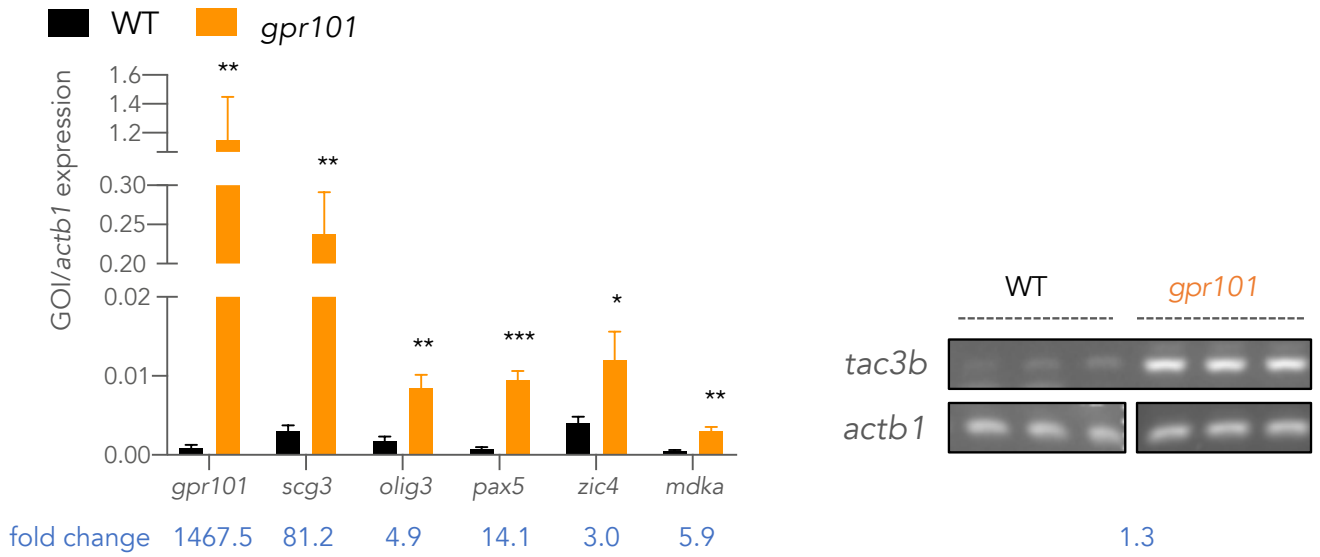

# Supplementary Figure 7

a

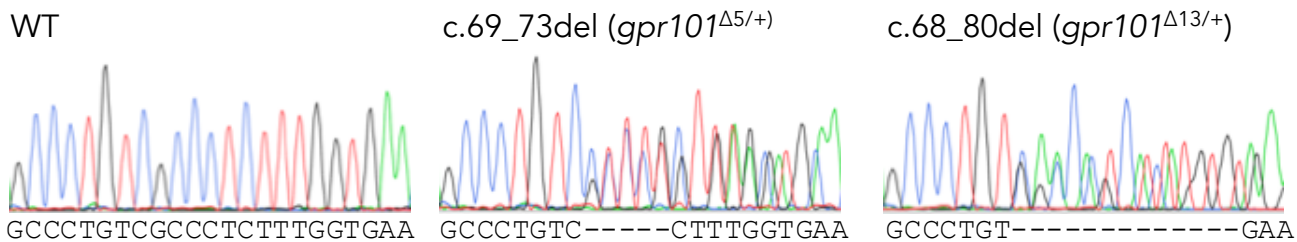

b

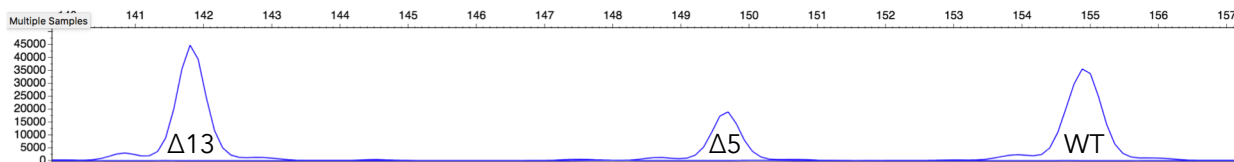

c

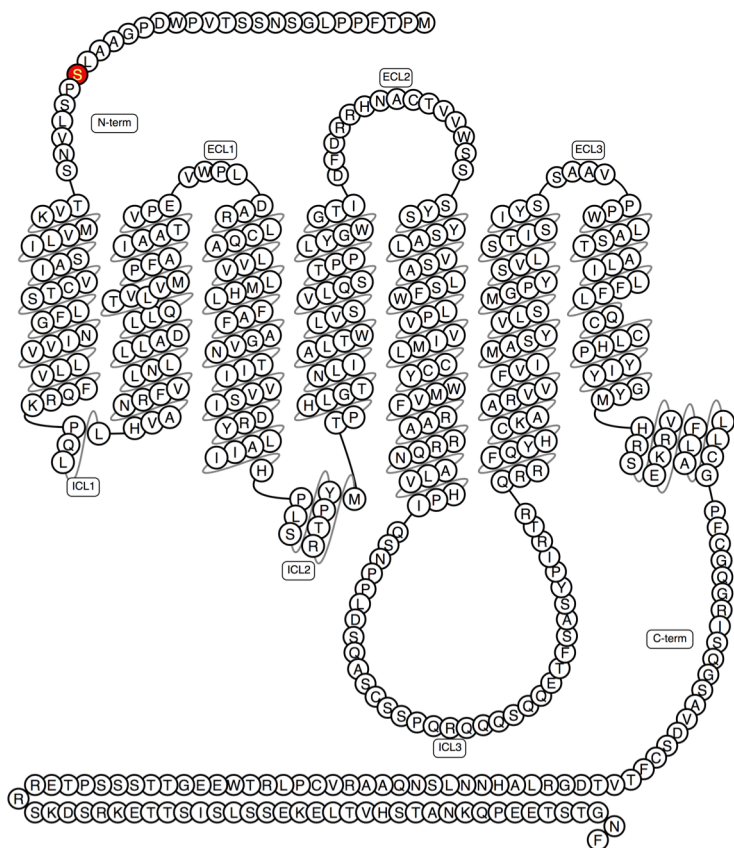

# Supplementary Figure 8

a

## Standard length

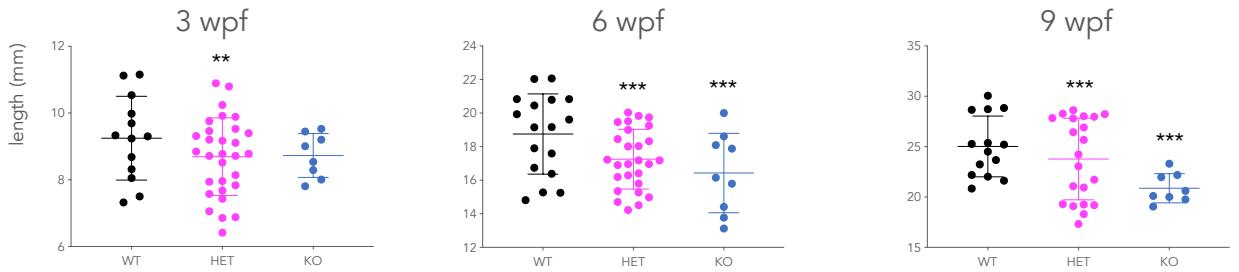

## Body weight

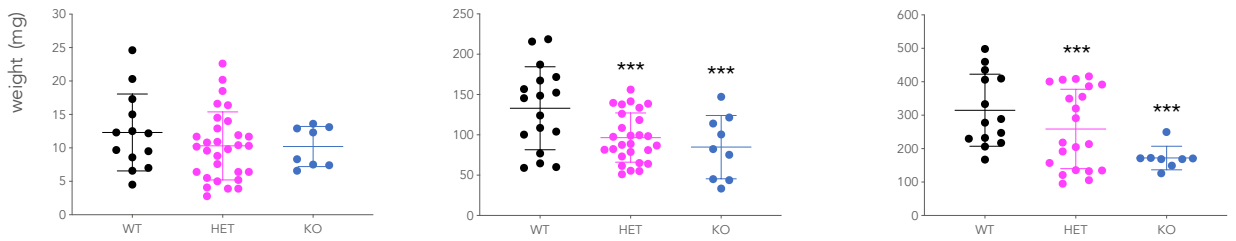

b

| 9 wpf fish | Female | Male | Ambiguous |
|------------|--------|------|-----------|
| WT         | 42.9   | 21.4 | 35.7      |
| HET        | 33.3   | 42.9 | 23.8      |
| KO         | 25.0   | 37.5 | 37.5      |

# Supplementary Figure 9

a

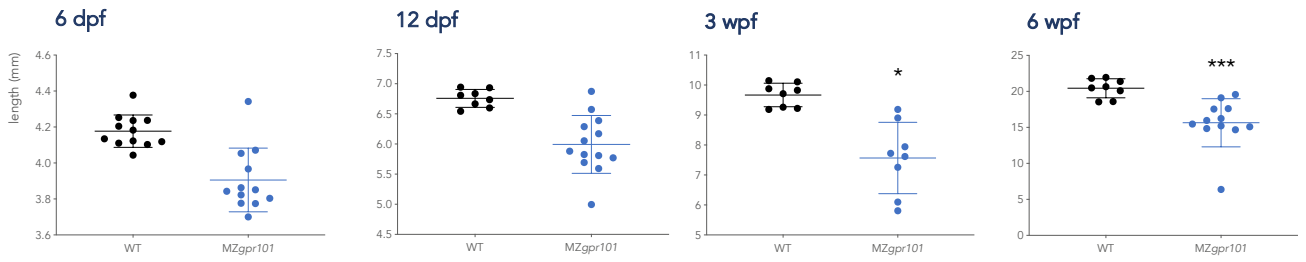

b

## Standard length

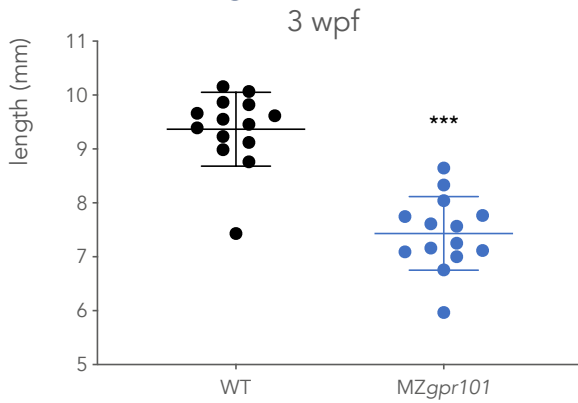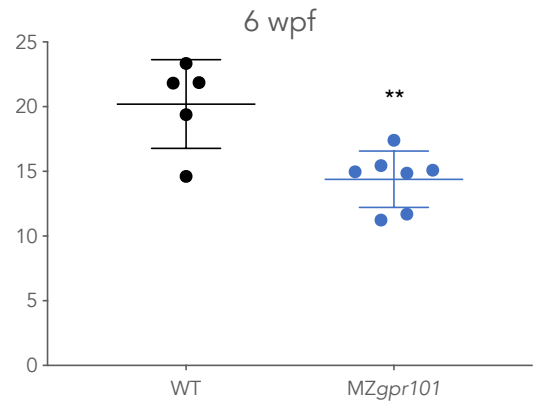

## Body weight

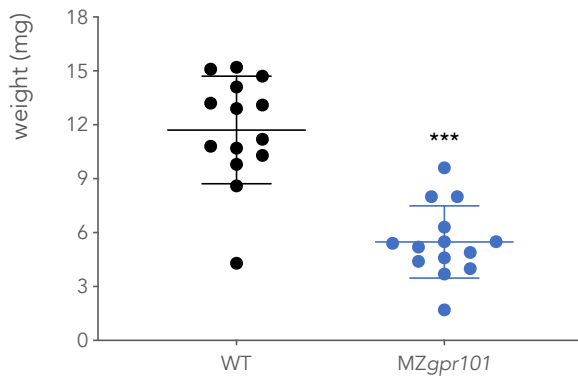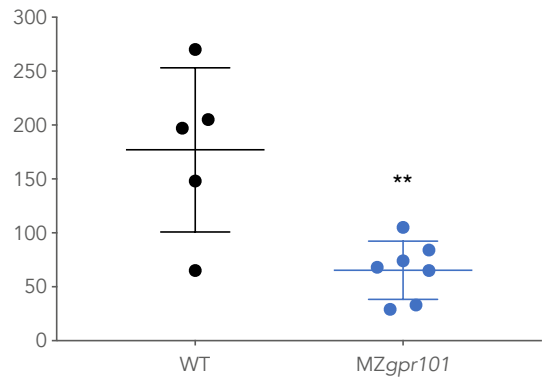

# Supplementary Figure 10

a

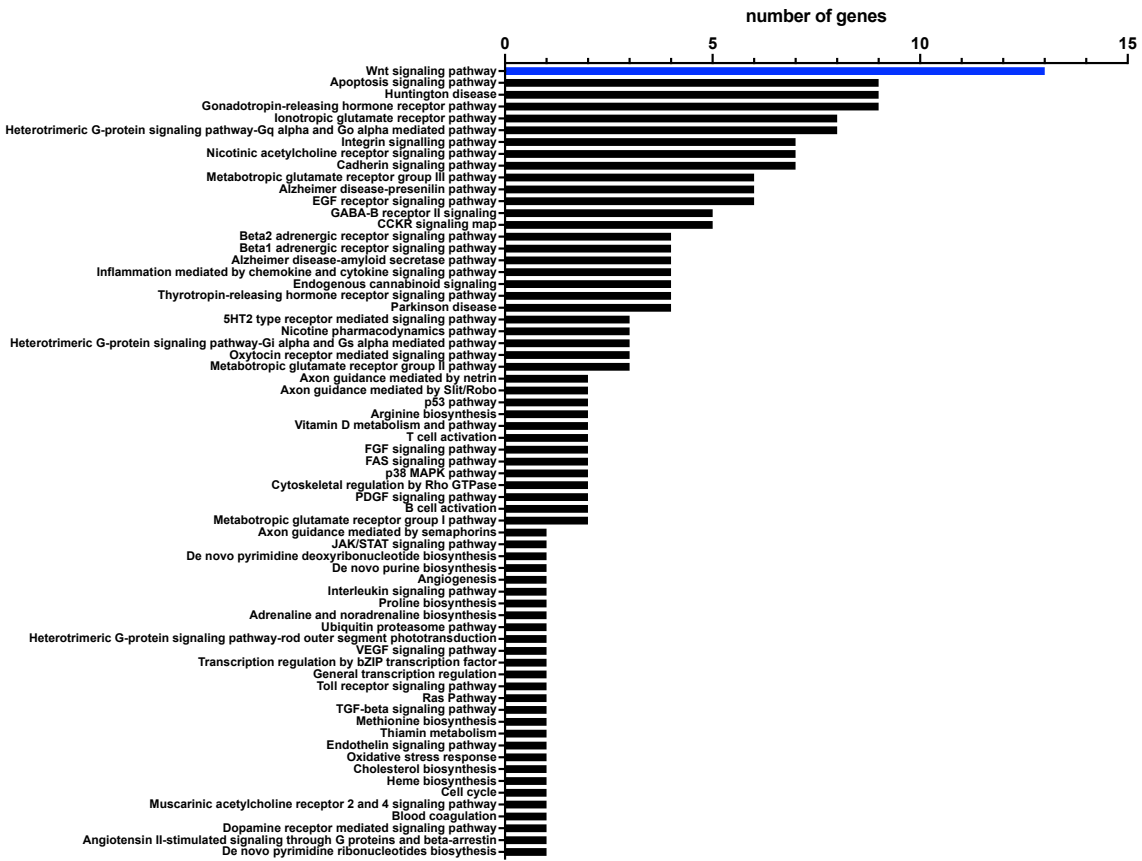

b

| gene name      | log2 fold change | q value |
|----------------|------------------|---------|
| <i>mmp30</i>   | 1.92             | 0.014   |
| <i>dvl3b</i>   | 1.80             | 0.008   |
| <i>fat3a</i>   | 1.67             | 0.00002 |
| <i>pcdh15b</i> | 1.49             | 0.013   |
| <i>tle2b</i>   | 1.31             | 0.04    |
| <i>celsr3</i>  | 1.29             | 0.0003  |
| <i>gna15.1</i> | 1.26             | 0.003   |
| <i>celsr2</i>  | 1.12             | 0.00005 |
| <i>ep400</i>   | 1.08             | 0.0003  |
| <i>tgfbr1b</i> | 1.06             | 0.013   |
| <i>acta1b</i>  | 1.02             | 0.04    |
| <i>fstl1a</i>  | -1.02            | 0.00002 |
| <i>pcdh20</i>  | -1.16            | 0.007   |

c

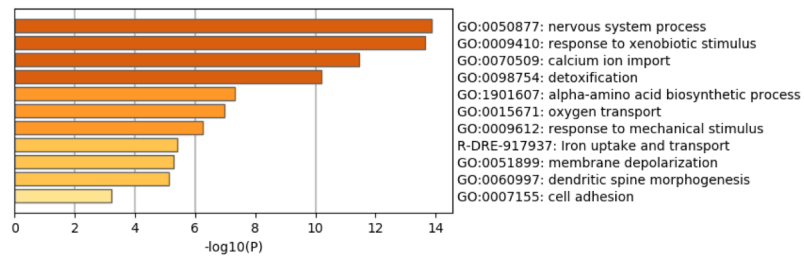

# Supplementary Figure 11

a

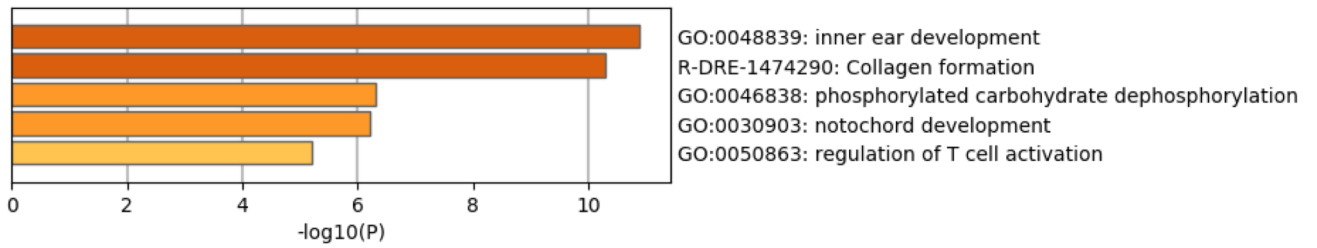

b

## Gene expression in unfertilized *gpr101* KO eggs

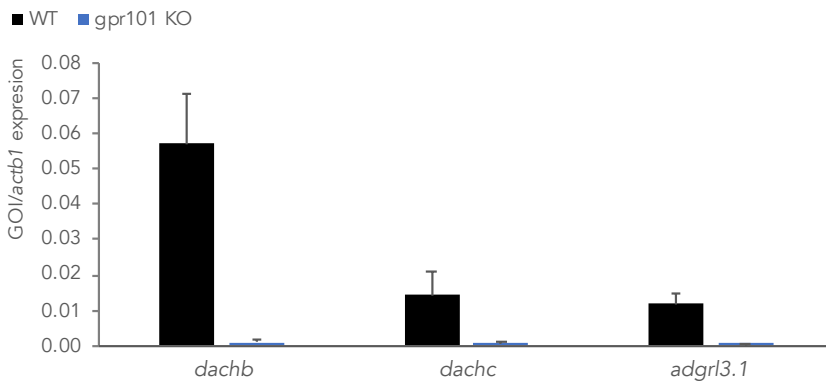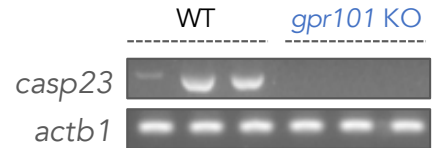

# Supplementary Figure 12

a

## *casp23* phenotype rescue in *MZgpr101* embryos

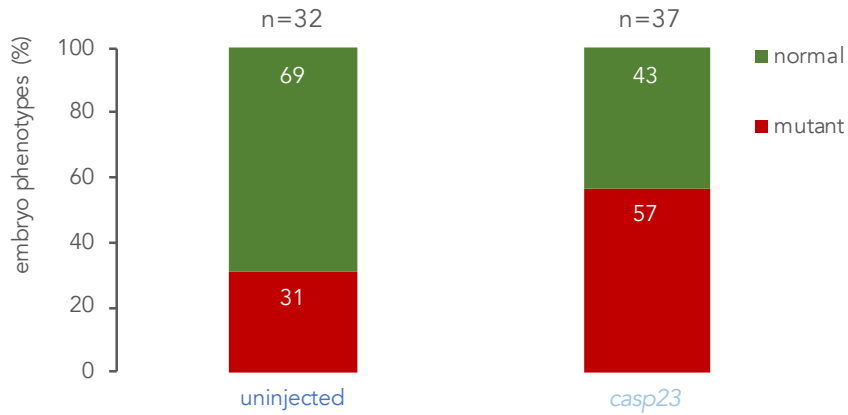

b

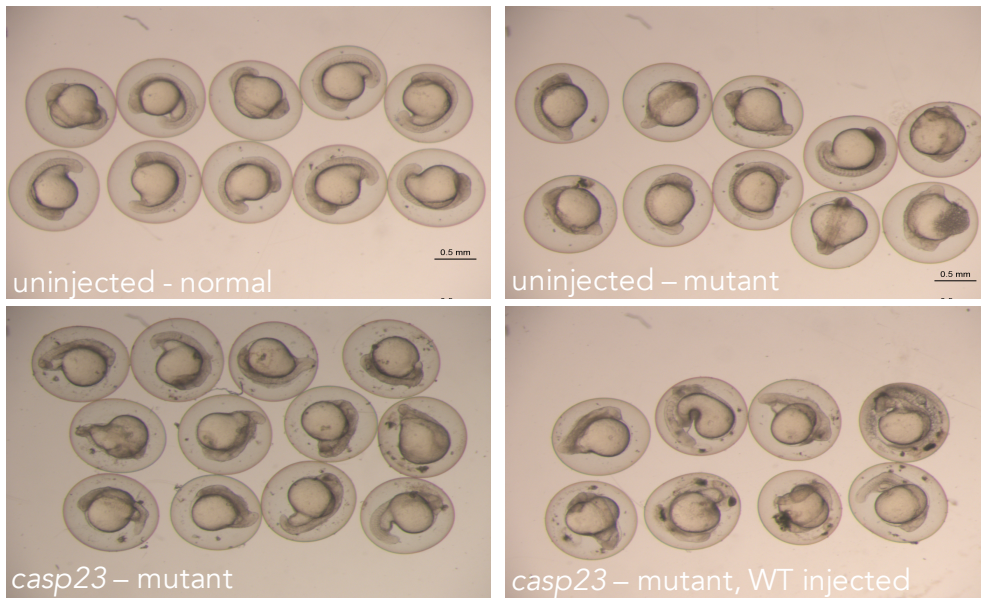

c

## *casp23* molecular rescue in *MZgpr101* embryos

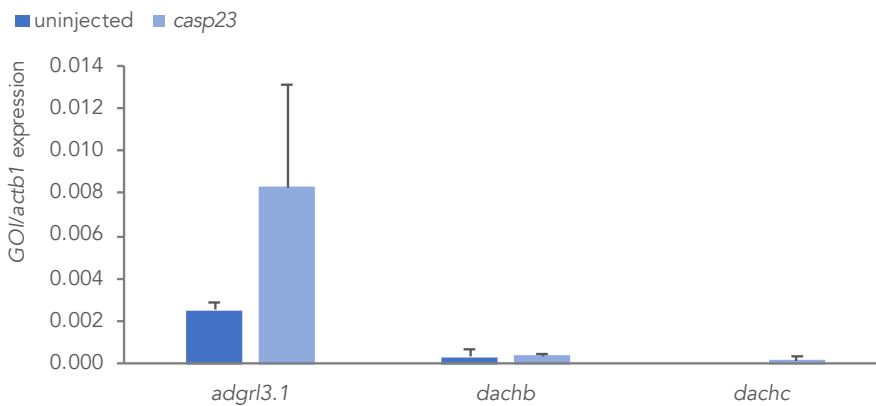



# Supplementary Figure 13

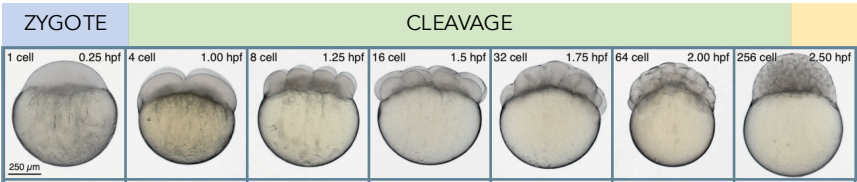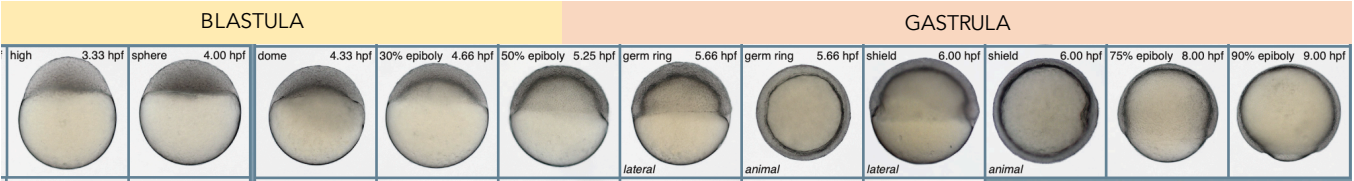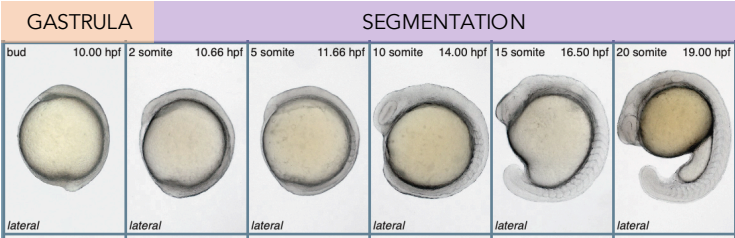

# Supplementary Figure 14

a

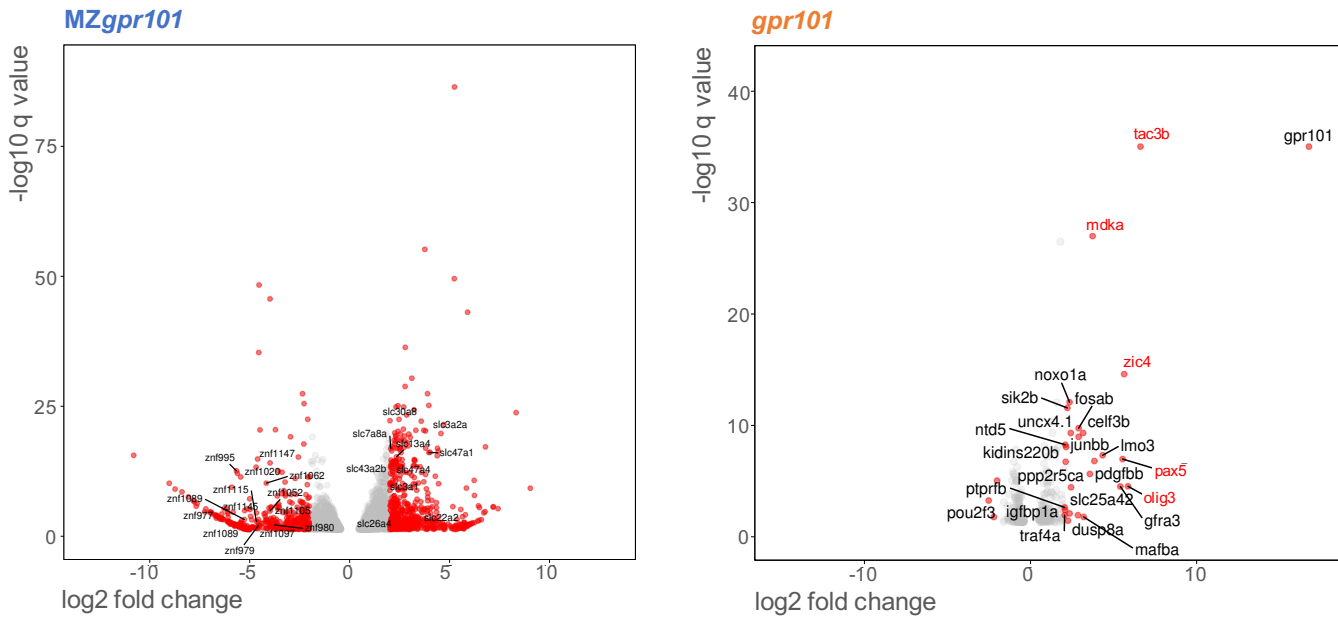

b

## Gene expression in MZgpr101 – 50% epiboly

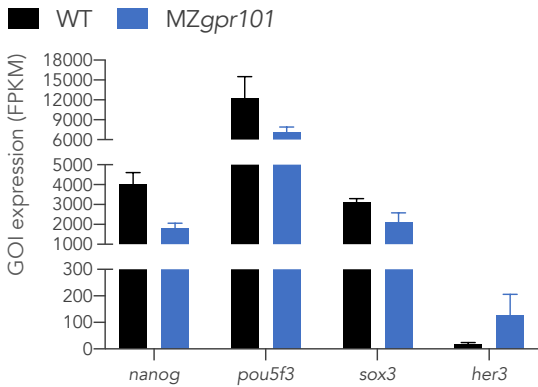

c

## Gene expression after gpr101 upregulation – 50% epiboly

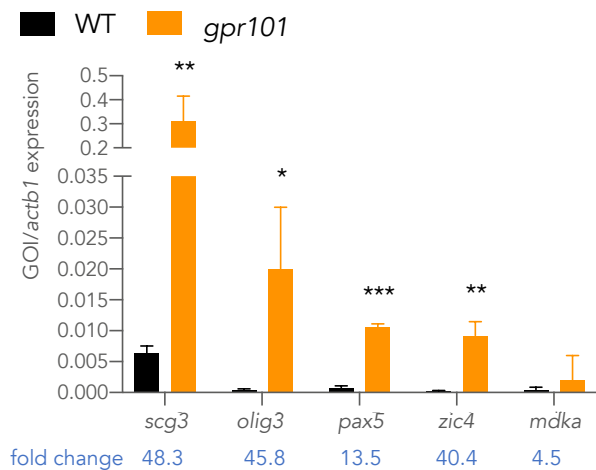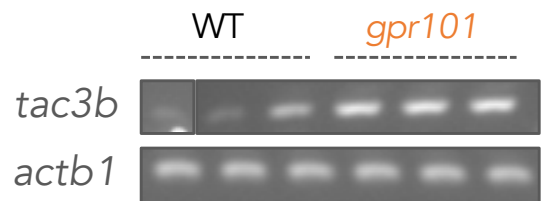

# Supplementary Figure 15

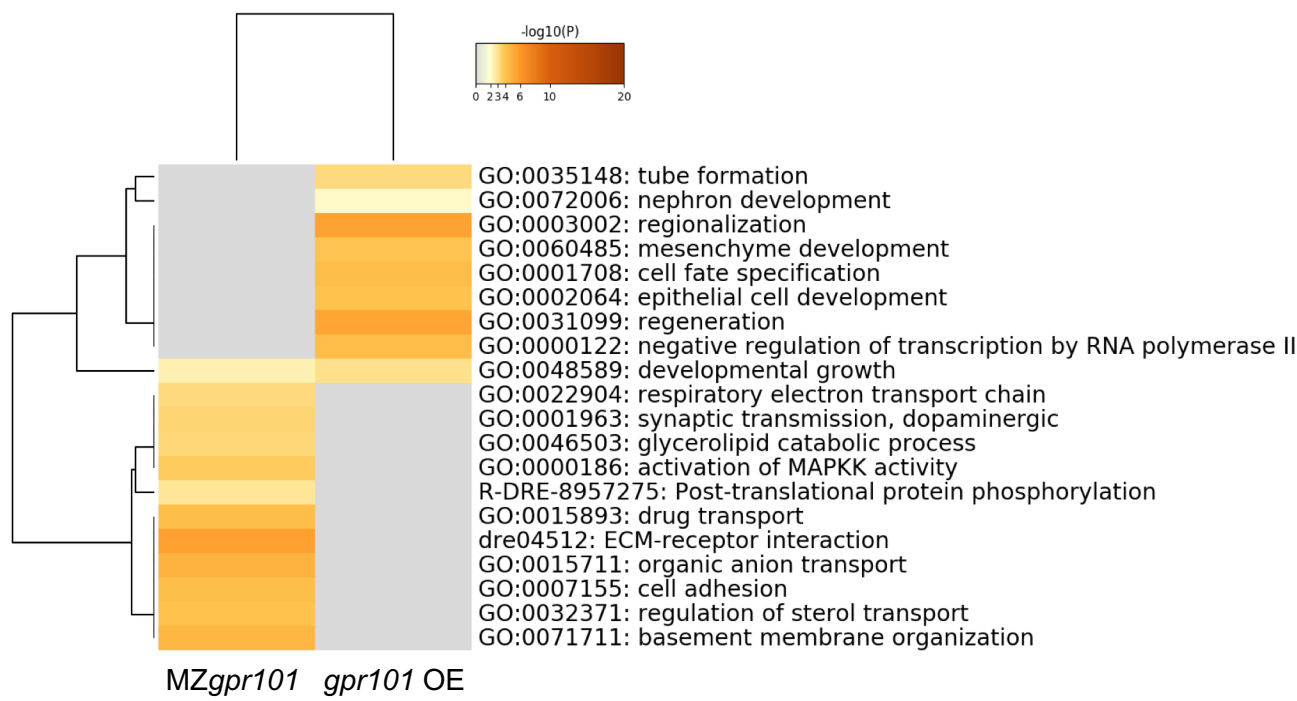

Supplement: NIHMS1650006-supplement-2.pdf [file NIHMS1650006-supplement-2.pdf]
